# Supplementary material
Source: PubMed Central journal article supplement (PMC7605171)
Supplement: NIHMS1640204-supplement-Supplement.pdf [file NIHMS1640204-supplement-Supplement.pdf]

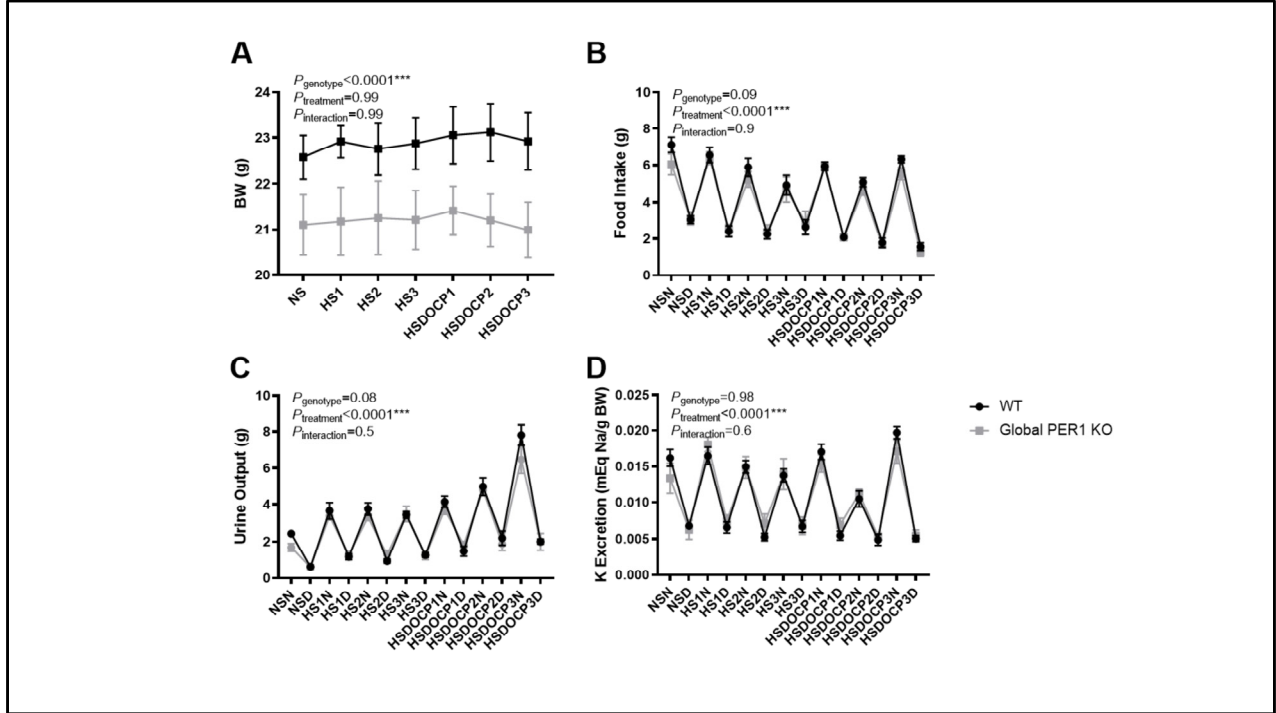

**Supplemental Figure 1: Metabolic Cage Study Parameters of Female WT and Global PER1 KO Mice with HS/DOCP.** Female WT and global PER1 KO mice were acclimated to metabolic cages and then urine collections were made on the 3<sup>rd</sup> day of normal salt diet (NS), 3 days of high salt (HS), and 3 days of HS plus DOCP (HS/DOCP). Night (N) corresponds to 6pm-6am (lights off; mouse active period). Day (D) corresponds to 6am-6pm (lights on; mouse inactive period). Body weight was measured once every 24hrs (A). 12-Hour food intake (B), urine output (C), and K excretion (D) are reported. N=6 per group, statistical significance measured by 2-way ANOVA with repeated measures to determine effects of genotype and treatment (\*\*\*)  $P < 0.0001$ ).

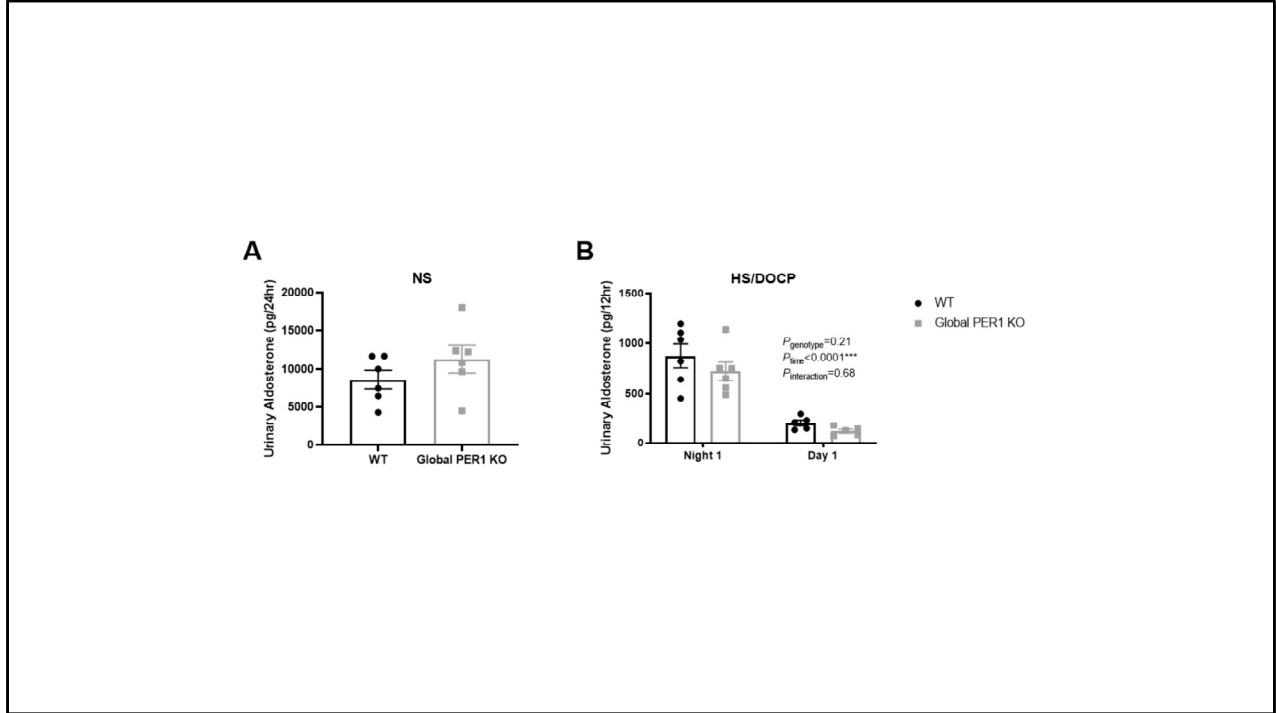

**Supplemental Figure 2: Urine Aldosterone Excretion in Female WT and Global PER1 KO Mice on a Normal Salt diet (NS) and HS/DOCP treatment.** Urine aldosterone was measured by ELISA in Female WT and global PER1 KO mice on a normal salt diet (NS) (A) and during the first 24hrs of the HS plus DOCP (HS/DOCP) treatment (B). N=6 per group, statistical significance in (A) was measured by *T*-test ( $P=0.25$ ), and in (B) by 2-way ANOVA to determine effects of genotype and time ( $***P<0.0001$ ).
